# Supplementary material for: Prevalence and clinical features of autosomal dominant and recessive TMC1-associated hearing loss
Source: PubMed Central journal article supplement (PMC9034981; doi:10.1007/s00439-021-02364-2), 2021-09-14

**Prevalence and clinical features of autosomal dominant and recessive *TMCI*-associated hearing loss.**

Shin-ya Nishio<sup>1</sup>, Shin-ichi Usami<sup>1</sup>.

1. Department of Hearing Implant Sciences, Shinshu University School of Medicine, 3-1-1 Asahi Matsumoto, Japan.

**Supplemental Figure 1.** Pedigree and audiograms for each family with *TMCI* variants. Arrows indicate the probands in each family. Genetic findings for each individual are shown in the pedigree. The age at audiometric testing is shown below the audiogram.

**Supplemental Figure 2.** Detailed progression analysis of each DFNA36 mutation. Hearing thresholds from audiograms (the better ear) of the patients of each DFNA36 mutation were plotted for each frequency. Estimated age-related typical audiogram (ARTA) demonstrating the progression of hearing loss for each DFNA36 mutation. For p.Gly417Arg mutation in previous reports did not indicate the hearing threshold for 125 Hz, so we excluded from analysis.

Family No.O4886

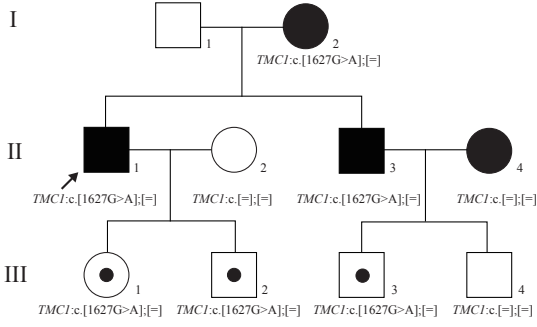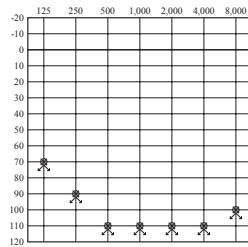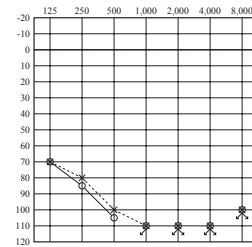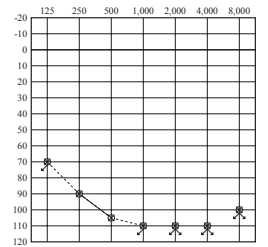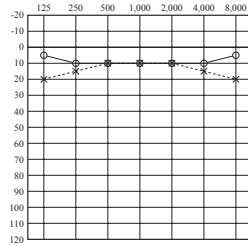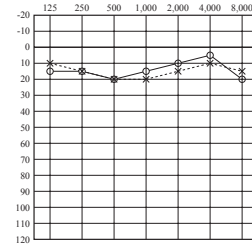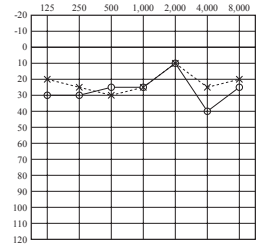

Family No.O4091

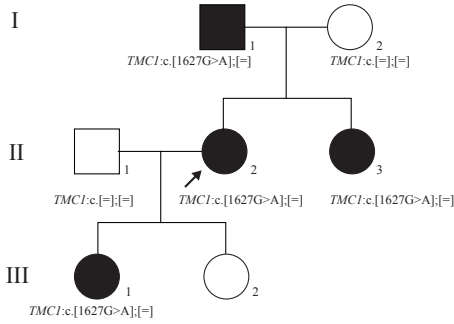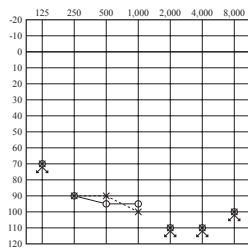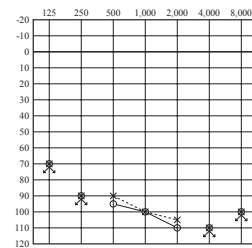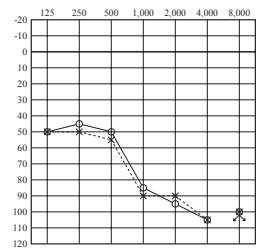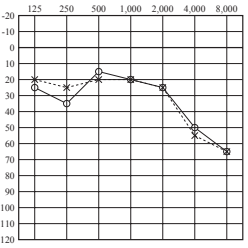

Family No.O5030

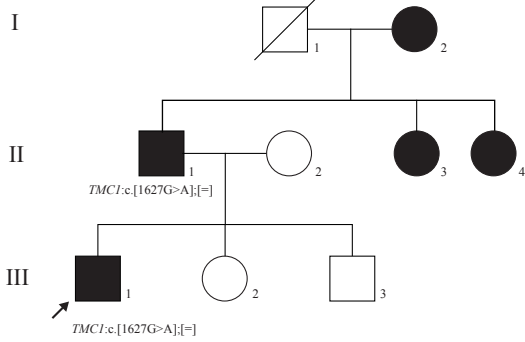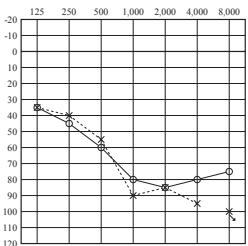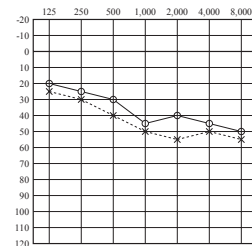

Family No.HL2672

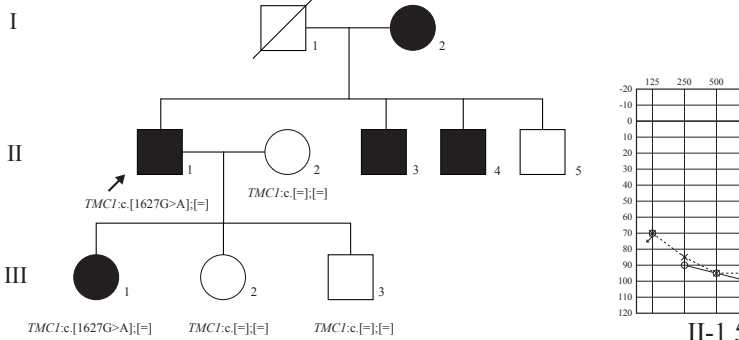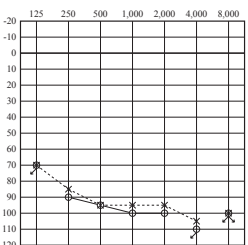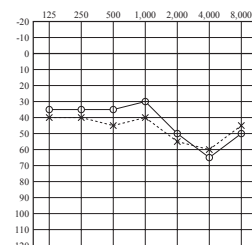

Family No.O0487

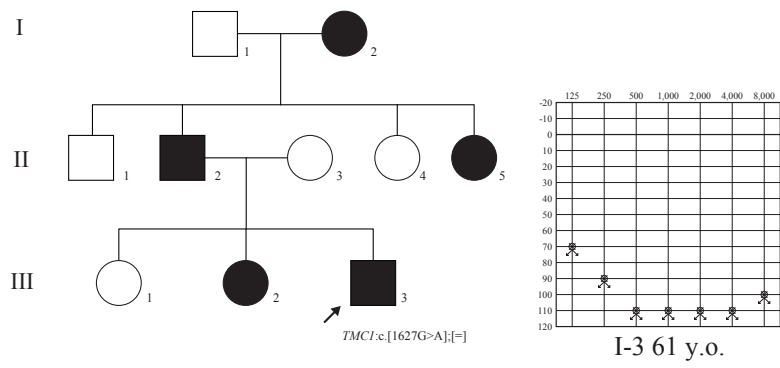

Family No.HL9117

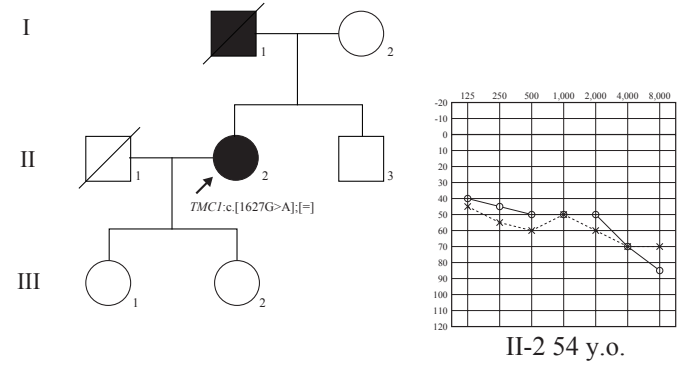

Family No.HL6536

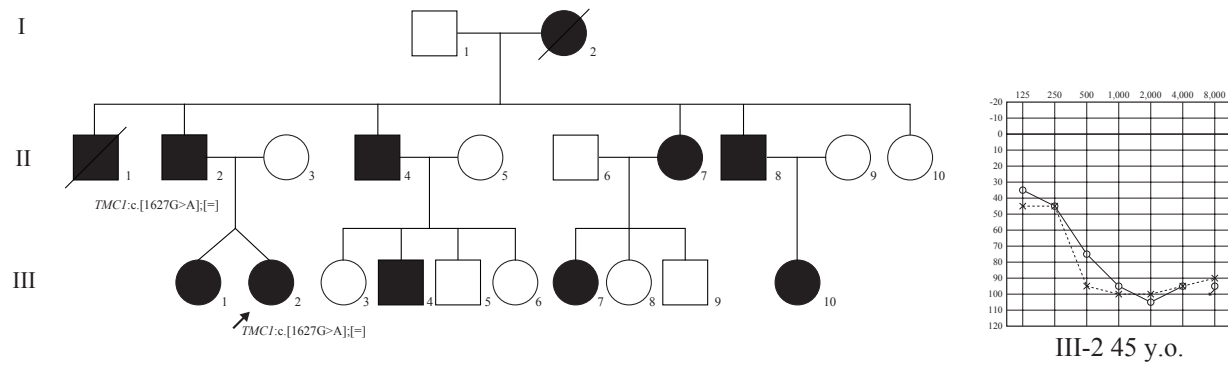

Family No.HL9205

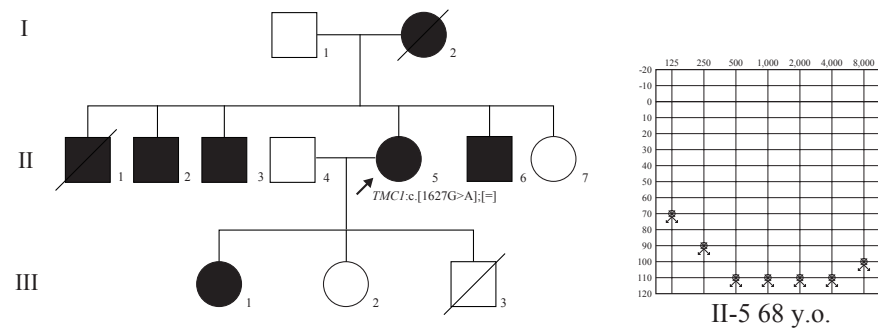

Family No.HL9597

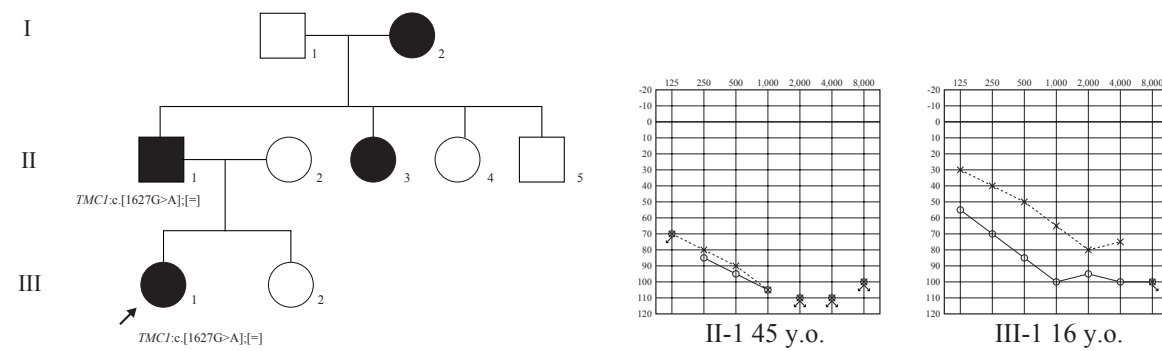

Detailed clinical information for HL4994, HL6717, HL4498, HL8588 and HL7492 were not available.

Family No.HL3819

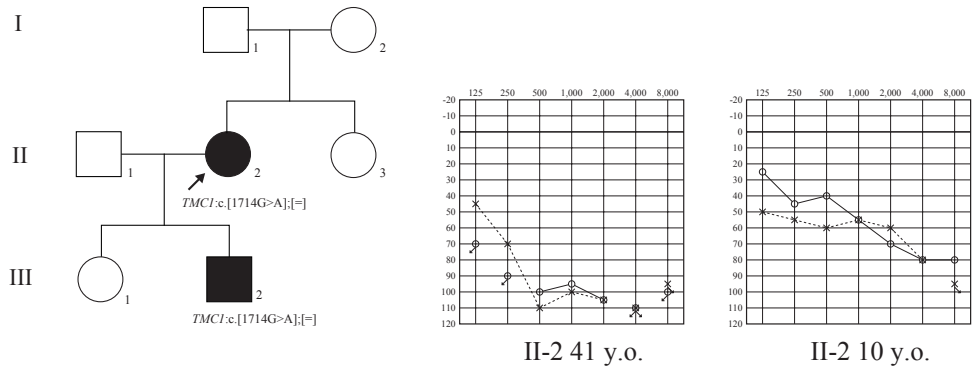

Family No.HL3123

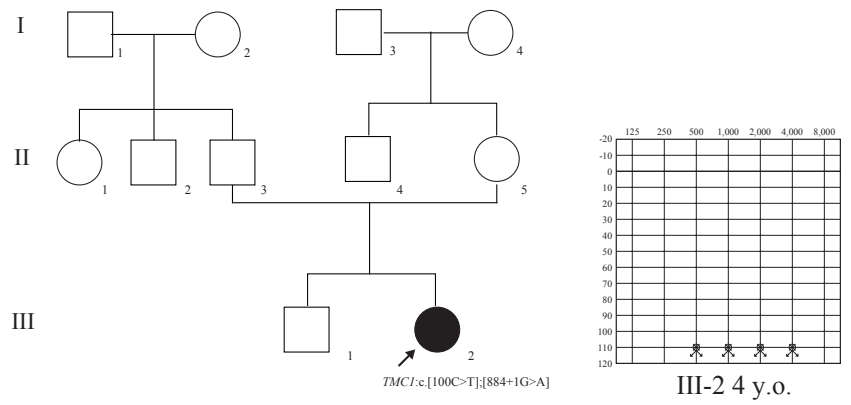

Family No.HL3604

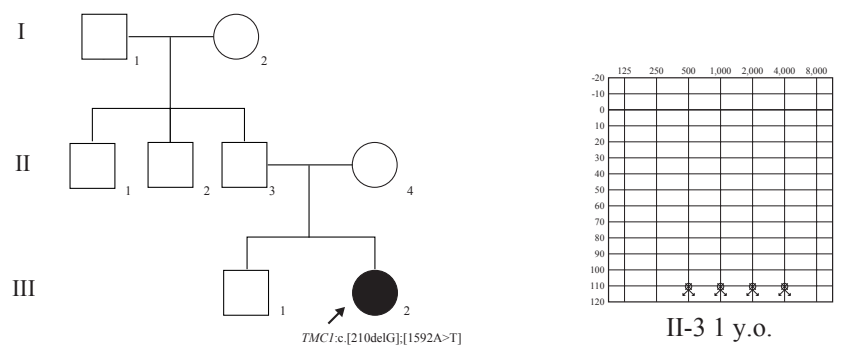

Family No.HL7927

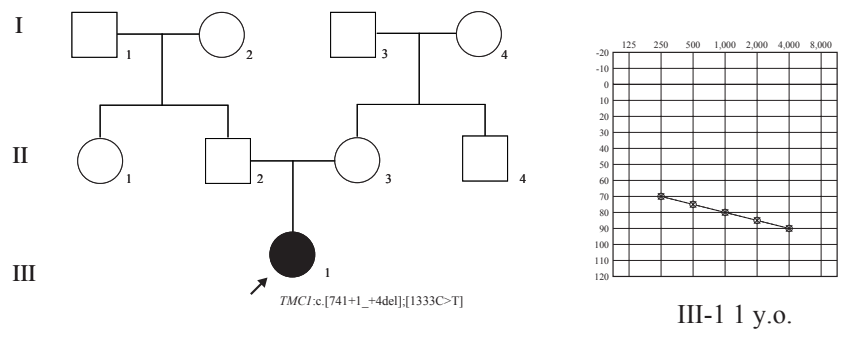

Family No.HL4017

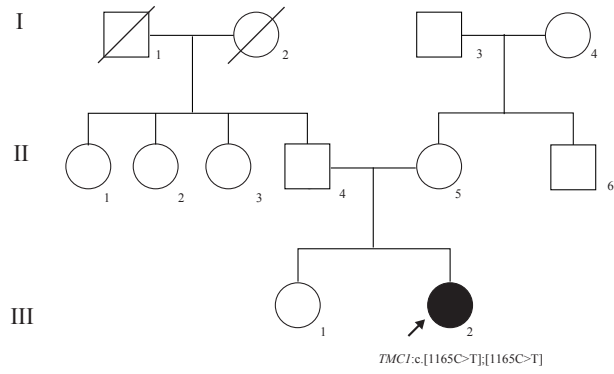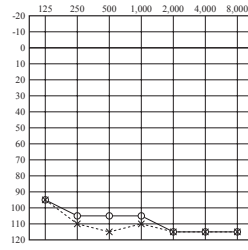

Family No.HL8573

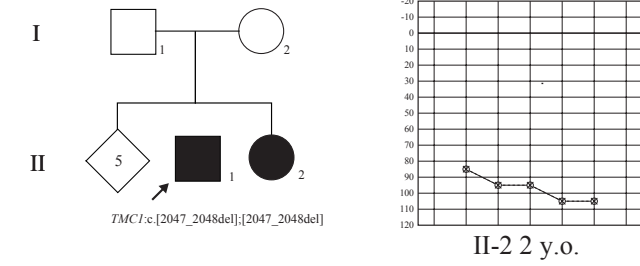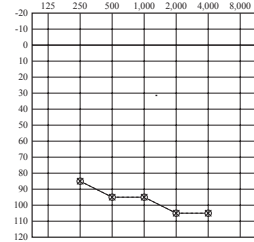

Family No.MED097

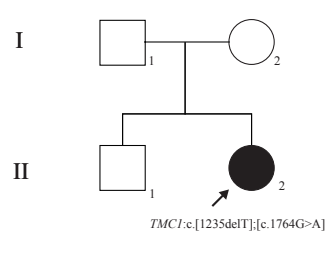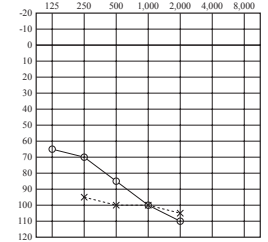

Family No.MED473

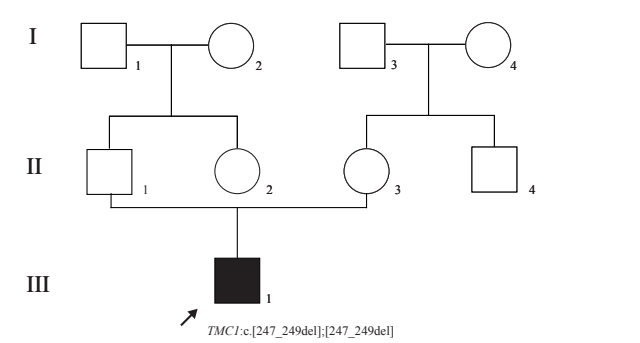

NA

Family No.MED214

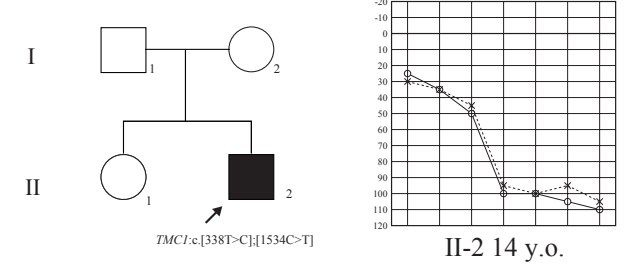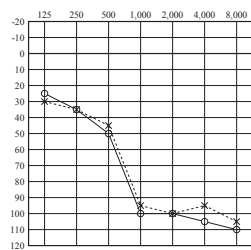

Family No.MED138

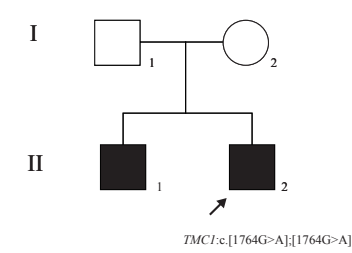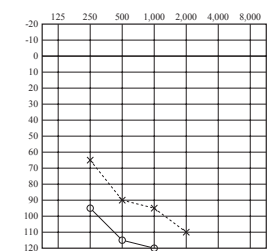

Family No.MED131

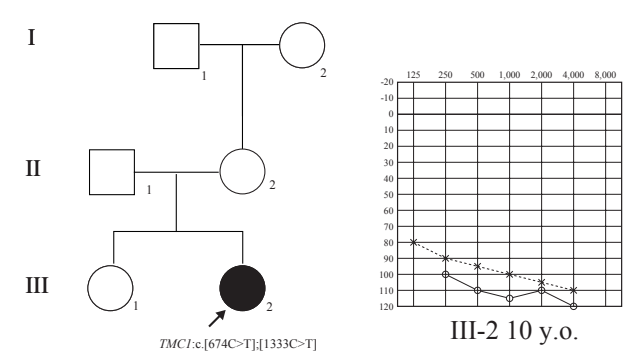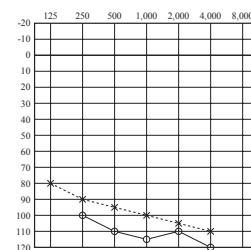

Family No.MED430

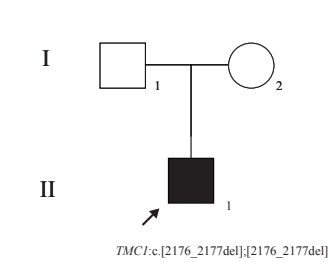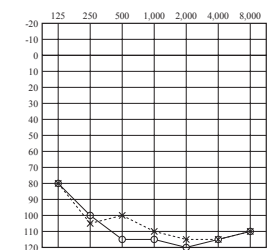

p.Asp543Asn

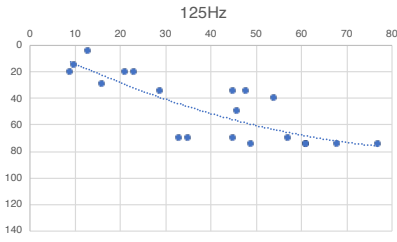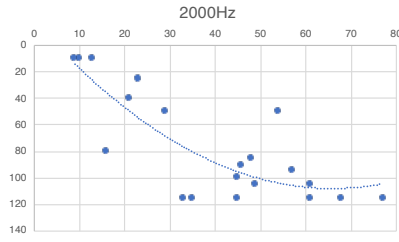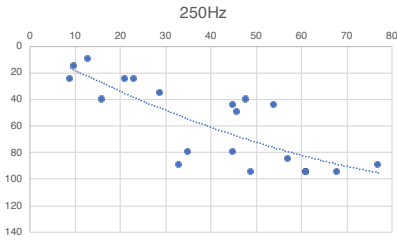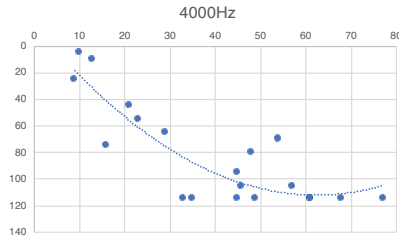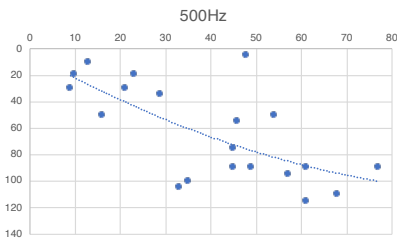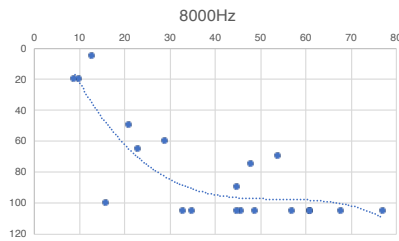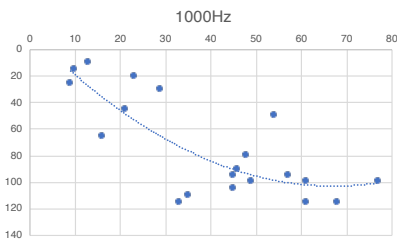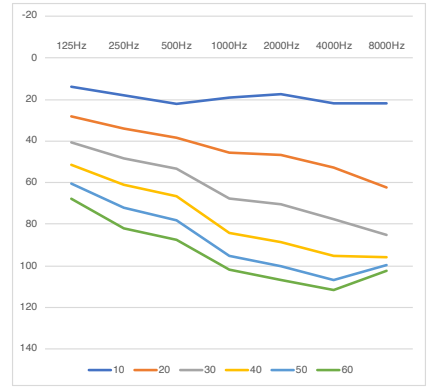

p.Met418Lys

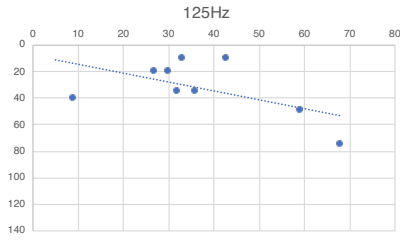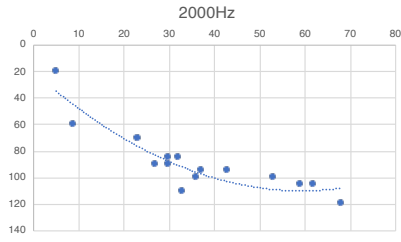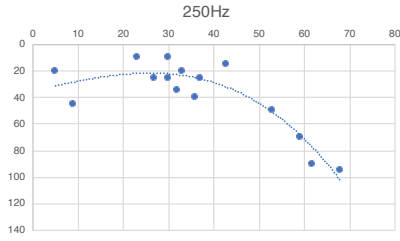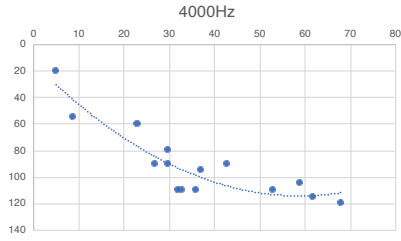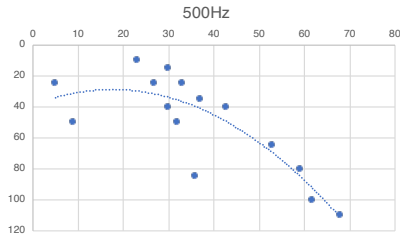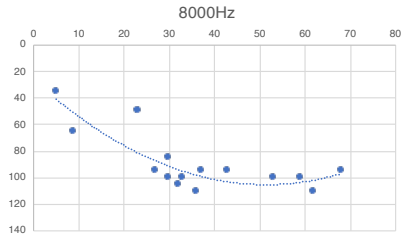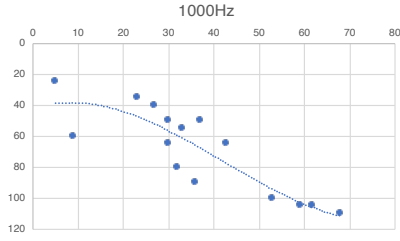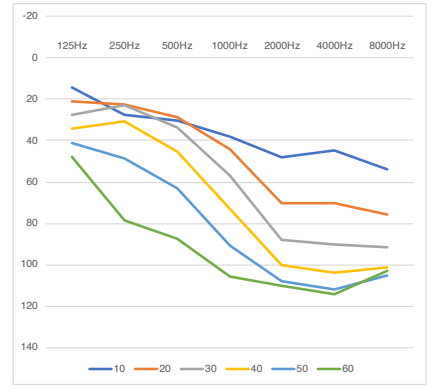

p.Asp572Asn

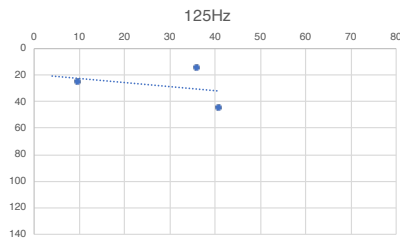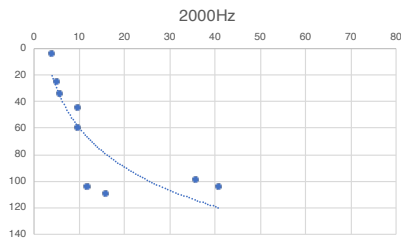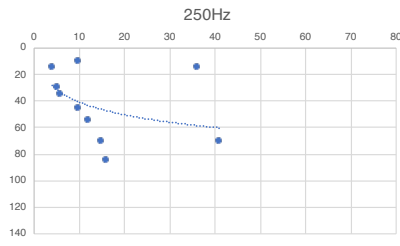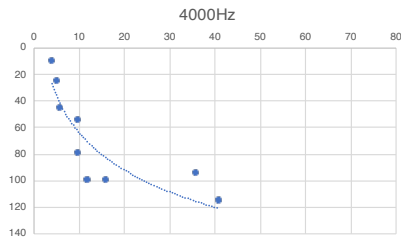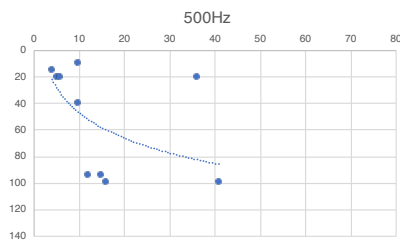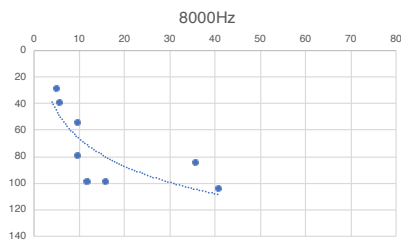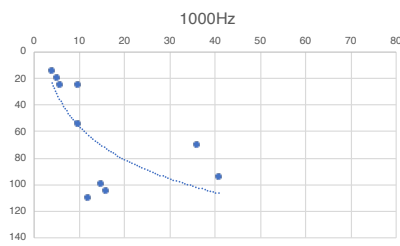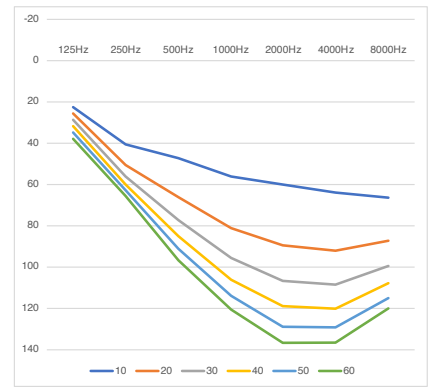

Supplement: 439_2021_2364_MOESM1_ESM.pdf [file 439_2021_2364_MOESM1_ESM.pdf]
